# Supplementary material for: [LnIIAlIII2(alkyl)8]x: donor addition instead of donor-induced cleavage
Source: Royal Society of Chemistry journal article supplement (doi:10.1039/b512047k), 2005-01-01
Supplement: b512047k.pdf [file b512047k.pdf]

## **Supplementary Material**

---

### **$\text{Ln}^{\text{II}}\text{Al}^{\text{III}}_2(\text{alkyl})_8$ : donor addition instead of donor-induced cleavage†**

**Marcus G. Schrems, H. Martin Dietrich, Karl W. Törnroos and Reiner Anwander\***

*\* Department of Chemistry, University of Bergen, Allégaten 41, N-5007 Bergen, Norway. E-mail: reiner.anwander@kj.uib.no.*

## Experimental Details

**General Procedures.** All operations were performed with rigorous exclusion of air and water, using standard Schlenk, high-vacuum, and glovebox techniques (MB Braun MB200B; <0.1 ppm O<sub>2</sub>, <0.1 ppm H<sub>2</sub>O). Hexane, THF, and toluene were purified by using Grubbs columns (MBraun SPS, solvent purification system). C<sub>6</sub>D<sub>6</sub> was obtained from Deutero GmbH, degassed, dried over Na/K alloy for 24 h, and filtered. AlMe<sub>3</sub> (*ABCR*, 98% purity), AlEt<sub>3</sub> (*Aldrich*, 94% purity), and 1,10-phenanthroline (*Aldrich*) were used as received. Sm[N(SiMe<sub>3</sub>)<sub>2</sub>]<sub>2</sub>(THF)<sub>2</sub> (**1a**) was prepared according to published literature procedures by reacting SmI<sub>2</sub>(THF)<sub>2</sub> with 1.9 eq. KN(SiMe<sub>3</sub>)<sub>2</sub> in THF and crystallised from hexane [9]. YbAl<sub>2</sub>Et<sub>8</sub> (**3b**) was synthesized according to [8]. <sup>1</sup>H and <sup>13</sup>C NMR data were obtained in C<sub>6</sub>D<sub>6</sub> solution at 25 °C from a *BRUKER-AVANCE-DMX400* (<sup>1</sup>H: 400.13 MHz; <sup>13</sup>C: 100.62 MHz). <sup>1</sup>H and <sup>13</sup>C shifts are referenced to internal solvent resonances and reported in *parts per million* relative to TMS. IR spectra were recorded on a *NICOLET-Impact 410 FTIR* spectrometer as Nujol mulls sandwiched between CsI plates. Elemental analyses were performed on an *Elementar Vario EL III*.

**Procedure for synthesizing SmAl<sub>2</sub>Me<sub>8</sub> (2a).** In a glovebox, 0.50 mmol (308 mg) of Sm[N(SiMe<sub>3</sub>)<sub>2</sub>]<sub>2</sub>(THF)<sub>2</sub> (**1a**) were dissolved in 10 ml of hexane. Upon addition of excess trimethylaluminum (288 mg, 3.99 mmol) diluted with 10 mL of hexane, **2a** precipitated quantitatively from the solution. The reaction mixture was stirred for 2 h at ambient temperature and then centrifuged, leaving a light purple precipitate and a clear colorless solution. The precipitate was washed several times with 3 mL of hexane to yield **2a** as a light purple powder in almost quantitative yield (154 mg, >95%). Compound **2a** is insoluble in aliphatic and aromatic hydrocarbons.

**SmAl<sub>2</sub>Me<sub>8</sub> (2).** IR (Nujol, cm<sup>-1</sup>): 1195 w, 1171 w, 1039 m, 795 w, 778 w, 705 m, 627 w, 602 w, 573 m, 554 m, 512 w, 476 w, 459 w, 424 w. Elemental analysis: calculated C (29.60), H (7.45); found C (30.53), H (7.54).

**Procedure for synthesizing SmAl<sub>2</sub>Et<sub>8</sub> (3a).** In a glovebox, 1.00 mmol (615 mg) of Sm[N(SiMe<sub>3</sub>)<sub>2</sub>]<sub>2</sub>(THF)<sub>2</sub> (**1a**) were dissolved in 5 ml of hexane. Upon addition of excess triethylaluminum (915 mg, 8.01 mmol) diluted with 5 mL of hexane, no visible reaction occurred. The reaction mixture was stirred overnight at ambient temperature and then

centrifuged (no precipitate), filtered and crystallized at  $-35\text{ }^{\circ}\text{C}$  to form black crystals of **3a** in 80% yield (347 mg).

**SmAl<sub>2</sub>Et<sub>8</sub> (3a).** <sup>1</sup>H NMR (C<sub>6</sub>D<sub>6</sub>, 25 °C):  $\delta = -1.4$  (s br, 24H, CH<sub>3</sub>),  $-38.3$  (s br, 16H, CH<sub>2</sub>). <sup>13</sup>C NMR (C<sub>6</sub>D<sub>6</sub>, 25 °C):  $-15.1$  (CH<sub>3</sub>). IR (Nujol, cm<sup>-1</sup>): 1176 w, 1093 m, 973 m, 944 m, 649 m, 588 m, 498 w, 468 w. Elemental analysis: calculated C (43.99), H (9.23); found C (42.27), H (8.43).

**General procedure for synthesizing donor adduct complexes LnAl<sub>2</sub>Et<sub>8</sub>(THF)<sub>2</sub>.** To a stirred solution of LnAl<sub>2</sub>Et<sub>8</sub> in 8 ml of hexane were added 2 eq. of THF diluted with 8 mL of hexane (no visible reaction). After 2 hours stirring, half of the solvent was evaporated. The remaining solution was filtered and the product isolated by crystallisation from hexane at  $-35\text{ }^{\circ}\text{C}$ .

**SmAl<sub>2</sub>Et<sub>8</sub>(THF)<sub>2</sub> (4a).** According to above procedure **3a** (130 mg, 0.30 mmol) and THF (44 mg, 0.6 mmol) gave black **4a** (131 mg, 0.23 mmol), 75% crystallized yield. <sup>1</sup>H NMR (C<sub>6</sub>D<sub>6</sub>, 25 °C):  $\delta = 2.75$  (s br, 8H, THF-II), 1.9 (s br, 24H, CH<sub>3</sub>),  $-1.38$  (s br, 8H, THF-I),  $-28.0$  (s br, 16H, Al-CH<sub>2</sub>). <sup>13</sup>C NMR (C<sub>6</sub>D<sub>6</sub>, 25 °C): 20.4 (THF),  $-5.2$  (-CH<sub>3</sub>). IR (Nujol, cm<sup>-1</sup>): 1174 w, 1030 m, 980 m, 943 m, 885 w, 868 w, 771 w, 644 m. Elemental analysis: calculated C (49.61), H (9.71); found C (49.23), H (9.51).

**YbAl<sub>2</sub>Et<sub>8</sub>(THF)<sub>2</sub> (4b).** According to above procedure **3b** (138 mg, 0.30 mmol) and THF (46 mg, 0.64 mmol) gave light yellow **4b** (148 mg, 0.25 mmol), 82% crystallized yield. <sup>1</sup>H NMR (C<sub>6</sub>D<sub>6</sub>, 25 °C):  $\delta = 3.33$  (m, 8H, THF-I), 1.54 (t, <sup>3</sup>J<sub>H,H</sub> = 7.8 Hz, 24H, CH<sub>3</sub>), 1.17 (m, 8H, THF-II), 0.20 (q, <sup>3</sup>J<sub>H,H</sub> = 7.8 Hz, 16H, Al-CH<sub>2</sub>). <sup>13</sup>C NMR (C<sub>6</sub>D<sub>6</sub>, 25 °C): 70.3 (-CH<sub>2</sub>CH<sub>2</sub>O-), 25.2 (-CH<sub>2</sub>O-), 12.0 (-CH<sub>3</sub>), 7.0 (Al-CH<sub>2</sub>-). IR (Nujol, cm<sup>-1</sup>): 1154 w, 1020 m, 975 m, 925 w, 863 m, 634 m, 527 w. Elemental analysis: calculated C (47.75), H (9.35); found C (47.43), H (9.24).

**General procedure for synthesizing donor adduct complexes LnAl<sub>2</sub>Et<sub>8</sub>(Py)<sub>2</sub>.** To a stirred solution of LnAl<sub>2</sub>Et<sub>8</sub> in 8 ml of hexane were added 2 eq. of pyridine (Py) diluted with 8 mL of hexane. For Ln = Yb a colour change from yellow to red was observed. After 2 hours stirring, half of the solvent was evaporated. The remaining solution was filtered and cooled to  $-35\text{ }^{\circ}\text{C}$  overnight yielding **5a** as oily product and **5b** as red crystals, respectively.

**SmAl<sub>2</sub>Et<sub>8</sub>(Py)<sub>2</sub> (5a).** According to above procedure **3a** (135 mg, 0.31 mmol) and pyridine (49 mg, 0.62 mmol) gave **5a** (111 mg, 0.19 mmol), black oil, yield 60%. <sup>1</sup>H NMR (C<sub>6</sub>D<sub>6</sub>, 25 °C):  $\delta = 8.08$  (br s, 4H, Py), 6.70 (br, 2H, Py), 6.35 (br, 4H, Py), 1.42 (t, <sup>3</sup>J<sub>H,H</sub> = 7.9, 16H, Al-CH<sub>2</sub>),

0.38 (q,  $^3J_{\text{H,H}} = 7.9$ , Al-CH<sub>3</sub>).  $^{13}\text{C}$  NMR (C<sub>6</sub>D<sub>6</sub>, 25 °C): 147.0, 139.6, 125.0, 10.4 (-CH<sub>3</sub>), 0.5 (Al-CH<sub>2</sub>-). IR (Nujol, cm<sup>-1</sup>): 1610 m, 1215 w, 1185 w, 1156 w, 1073 m, 1054 m, 983 m, 946 m, 759 w, 698 m, 646 m, 629 m. Due to the oily composition of **5a** sufficient microanalytical data could not be obtained.

**YbAl<sub>2</sub>Et<sub>8</sub>(Py)<sub>2</sub> (5b).** According to above procedure **3b** (120 mg, 0.26 mmol) and pyridine (42 mg, 0.53 mmol) gave red **5b** (135 mg, 0.22 mmol), 84% crystallized yield.  $^1\text{H}$  NMR (C<sub>6</sub>D<sub>6</sub>, 25 °C):  $\delta = 8.16$  (br s, 4H, Py), 6.77 (br t, 2H, Py), 6.45 (br t, 4H, Py), 1.55 (t,  $^3J_{\text{H,H}} = 7.8$  Hz, 24 H, CH<sub>2</sub>CH<sub>3</sub>), 0.43 (q,  $^3J_{\text{H,H}} = 7.8$  Hz, 16H, CH<sub>2</sub>CH<sub>3</sub>).  $^{13}\text{C}$  NMR (C<sub>6</sub>D<sub>6</sub>, 25 °C): 149.0 (Py), 139.2 (Py), 121.9 (Py), 12.2 (-CH<sub>3</sub>), 7.8 (Al-CH<sub>2</sub>-). IR (Nujol, cm<sup>-1</sup>): 1598 w, 1216 w, 1186 w, 1157 w, 1070 w, 1037 w, 981 m, 952m, 753 m, 698 m, 645 m, 630 m. Elemental analysis: calculated C (50.56), H (8.16); found C (49.65), H (7.90).

**General procedure for synthesizing donor adduct complexes LnAl<sub>2</sub>Et<sub>8</sub>(phen).** To a stirred solution of LnAl<sub>2</sub>Et<sub>8</sub> in 8 ml of hexane was added 1 eq. of phenanthroline (phen) dissolved in 10 mL of toluene. For Ln = Yb a colour change from yellow to dark green was observed. After 2 hours stirring, half of the solvent was evaporated. The remaining solution was filtered and cooled to -35 °C overnight yielding **6a** as oily product and **6b** as dark green crystals, respectively.

**SmAl<sub>2</sub>Et<sub>8</sub>(phen) (6a).** According to above procedure **3a** (130 mg, 0.30 mmol) and phenanthroline (59 mg, 0.30 mmol) gave **6a** (124 mg, 0.20 mmol), dark red oil, yield 67%.  $^1\text{H}$  NMR (C<sub>6</sub>D<sub>6</sub>, 25 °C):  $\delta = 16.09$  (br s, 2H, phen), 5.66 (d,  $^3J_{\text{H,H}} = 8.2$  Hz, 2H, phen), 3.41 (br s, 2H, phen), 2.66 (d,  $^3J_{\text{H,H}} = 8.2$  Hz, 2H, phen), 1.05 (br s, 24 H, CH<sub>2</sub>CH<sub>3</sub>), -31.61 (br s, 16 H, CH<sub>2</sub>CH<sub>3</sub>).  $^{13}\text{C}$  NMR (C<sub>6</sub>D<sub>6</sub>, 25 °C): 173.9 (phen), 161.5 (phen), 120.2 (phen), 103.9 (phen), 87.9 (phen), -2.1 (-CH<sub>3</sub>). IR (Nujol, cm<sup>-1</sup>): 1520 w, 1155 w, 1082 w, 980 m, 946 m, 842 m, 773 w, 647 m. Elemental analysis: calculated C (54.50), H (7.84), N(4.54); found C (56.94), H (7.67), N (4.46).

**YbAl<sub>2</sub>Et<sub>8</sub>(phen) (6b).** According to above procedure **3b** (138 mg, 0.30 mmol) and phenanthroline (59 mg, 0.30 mmol) gave dark green **6b** (171 mg, 0.27 mmol), 89% crystallized yield.  $^1\text{H}$  NMR (C<sub>6</sub>D<sub>6</sub>, 25 °C):  $\delta = 8.72$  (d,  $^3J_{\text{H,H}} = 4.3$  Hz, 2H, phen), 7.24 (d,  $^3J_{\text{H,H}} = 8.1$  Hz, 2H, phen), 6.80 (s,  $^3J_{\text{H,H}} = 4.3$  Hz, 2H, phen), 6.73 (dd,  $^3J_{\text{H,H}} = 4.3$  Hz,  $^3J_{\text{H,H}} = 8.1$  Hz, 2H, phen), 1.52 (t,  $^3J_{\text{H,H}} = 7.6$  Hz, 24H, CH<sub>2</sub>CH<sub>3</sub>), 0.46 (q,  $^3J_{\text{H,H}} = 7.6$  Hz, 16H, CH<sub>2</sub>CH<sub>3</sub>).  $^{13}\text{C}$  NMR (C<sub>6</sub>D<sub>6</sub>, 25 °C): 150.1 (phen), 144.1 (phen), 138.9 (phen), 129.7 (phen), 127.1 (phen), 124.5 (phen), 12.0 (CH<sub>2</sub>CH<sub>3</sub>), 7.2 (CH<sub>2</sub>CH<sub>3</sub>). IR (Nujol, cm<sup>-1</sup>): 1517 w, 1146 w,

1098 w, 980 m, 944 m, 841 m, 766 w, 649 m. Elemental analysis: calculated C (52.57), H (7.56), N (4.38); found C (53.17), H (7.52), N (4.45).
